# Supplementary material for: The Effect of Filler Dimensionality and Content on Resistive Viscoelasticity of Conductive Polymer Composites for Soft Strain Sensors
Source: MDPI journal article supplement (doi:10.3390/polym15163379), 2023-08-11
Supplement: s1 [file s1]

# Content

Figure S1 The true stress-strain curves and monotonic strain sensing behaviors of CNT/SR and CB/SR composites.

Figure S2 The effect of stretch speed on (a) true stress-strain behavior and (b) resistance response.

The true stress-strain curves and relative resistance-strain curves for the CPCs were summarized in Figure S1. The nominal strain is calculated as [25]:

$$\varepsilon_{nom} = \Delta L / L_0, \quad (S1)$$

where  $L_0$  is the gauge length,  $\Delta L$  is the crosshead displacement corresponding to the undeformed state. The true strain  $\lambda$  is calculated as:

$$\lambda = \ln \left( 1 + \frac{\Delta L}{L_0} \right), \quad (S2)$$

The nominal stress,  $\sigma_{nom}$  is defined as:

$$\sigma_{nom} = F / S_0 \quad (S3)$$

where  $F$  is the measured force and  $S_0$  is the initial cross-sectional area of the specimen. Considering iso-volume deformation conditions, the true stress  $\sigma_t$  can be expressed as:

$$\sigma_t = \sigma_{nom} (1 + \varepsilon_{nom}) \quad (S4)$$

As shown in Figure S2, we compared the influence of stretch speed on the mechanical and resistive response of CPCs.

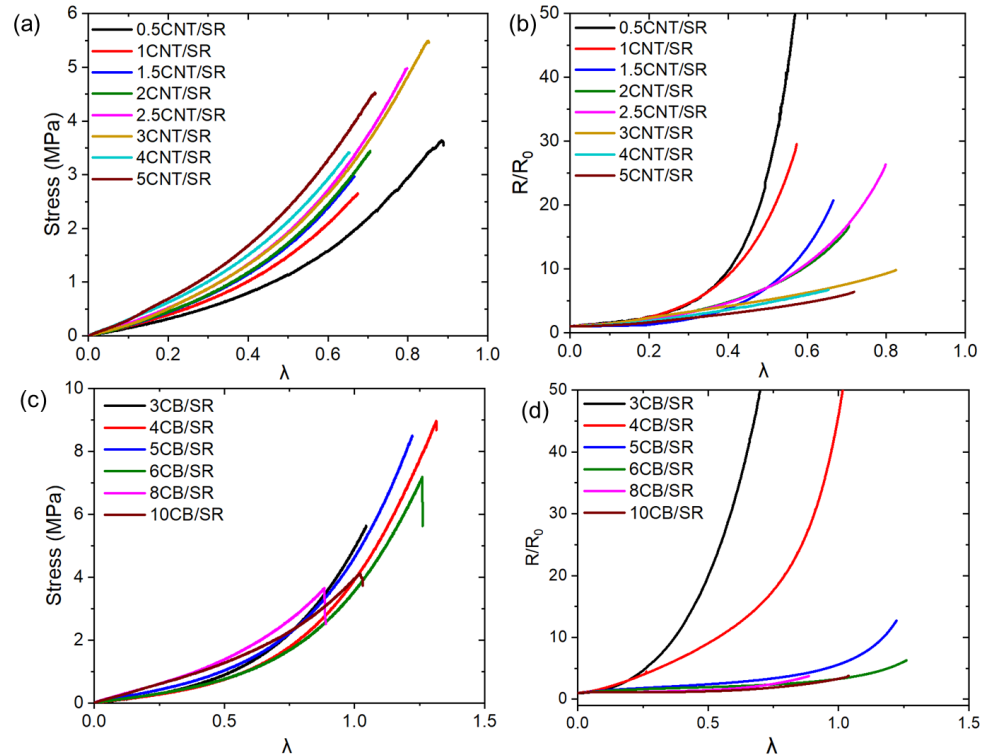

**Figure S1.** (a) The true stress-strain curves of CNT/SR; (b) Monotonic strain sensing behaviors of CNT/SR; (c) The true stress-strain curves of CB/SR; (d) Monotonic strain sensing behaviors of CB/SR.

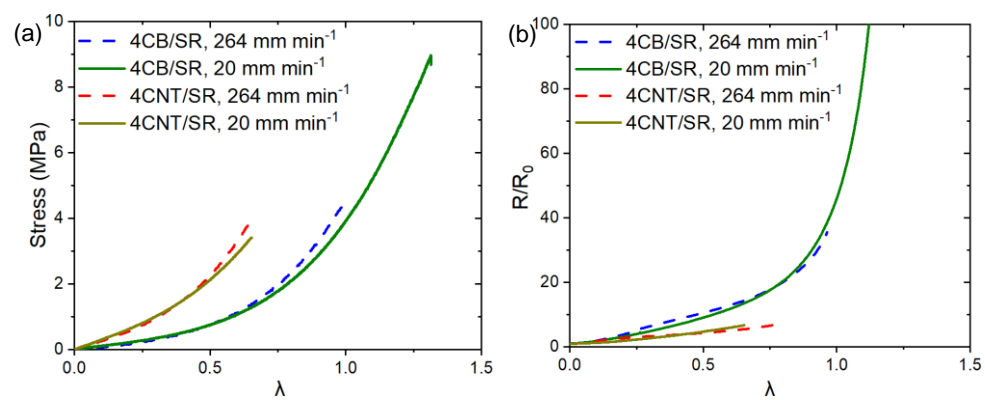

**Figure S2.** The effect of stretch speed on (a) true stress-strain behavior and (b) resistance response.
